# Supplementary material for: Seasonal variation of mercury concentration of ancient olive groves of Lebanon
Source: Copernicus journal article supplement (doi:10.5194/egusphere-2022-174), 2022-07-19
Supplement: Supplementary file 1 [file Table S2-Synthesis of studies.xlsx]

## Sheet: Synthesis
References	Species	Tissue/Organ	Country	Location	Year of sampling	Objective of the article	Used technique	Major result	Major Results in ng/g	Hg mean (ng/g)	Min	Max	Log (1/hg) mean	Log min	Log Max	T min. Annual Average (°C)	T max. Annual Average (°C)	T Annual Average (°C)	P Annual Average(mm)	Humidity (%)	SD log(1/Hg)	SD T°	SD Precip mm	SD Humidity %	Altidude (m.a.s.l.	Latitude	Reference for uncontamination in Soil	Reference	Reference for uncontamination Olive foliage	Reference	Reference for contaminated soil	Reference
Guarino et al. (2021)	O. europea L.	Foliage	Italy (South Italy)	Acerra	2007-2013	Evaluation of air quality in an interesting study area of the Campania Region (Napoli province) named “Land of pyres”.	Dried, powdered digested with HNO3 65% +50% HF in a 2:1 ratio volume. Inductively coupled plasma optical emission spectrometry (ICP-OES)	0.39 mg/kg	390	390			-2.59106														10 to 30 ng/g	Senesi et al. 1999	20 to 180 ng/g	Bargagli 1995	> 3000 ng/g	Kabata-Pendias 2001
	O. europea L.	Foliage	Italy (South Italy)	Brusciano				0.94 mg/kg	940	940			-2.97313														around 90 ng/g	Kabata-Pendias 2001	<200 ng/g	Kabata-Pendias 2001
	O. europea L.	Foliage	Italy (South Italy)	Pomigliano d’Arco				2.67 mg/kg	2670	2670			-3.42651														20 ng/g	World reference:Senesi et al. (1999)
	O. europea L.	Foliage	Italy (South Italy)	Marignanella				0.47 mg/kg	470	470			-2.6721
	O. europea L.	Foliage	Italy (South Italy)	Marigliano				1.94 m.kg	1940	1940			-3.2878
	O. europea L.	Foliage	Italy (South Italy)	San Vitaliano				1.62 mg/kg	1620	1620			-3.20952
	O. europea L.	Foliage	Italy (South Italy)	Saviano				0.29 mg/kg	290	290			-2.4624
	O. europea L.	Foliage	Italy (South Italy)	Bracigliano				2.67 mg/kg	2670	2670			-3.42651
	O. europea L.	Foliage	Italy (South Italy)	Fisciano				ND	ND	ND			ND
	O. europea L.	Foliage	Italy (South Italy)	Mercato San Severino				ND	ND	ND			ND																		-3.47712
Naharro et al. (2018)	O. europea L.	Foliage	Spain	Almadenejos (near mercury source)	8 July 2015 to 23 July 2016	Atmospheric mercury uptake and desorption from olive tree leaves	LUMEX RA-915+ Atomic Absorption with Zeeman Effect spectrometer, coupled with a PYRO-915+ pyrolytical attachment.	40-50 ng/g to 330 ng/g	40-50 to 330	185	40	330	-2.26717	-1.60206	-2.51851
	O. europea L.	Foliage	Spain	West of Almaden (No mercury sources)	23 June 2016 and 22 September 2016			15-20 ng/g	15-20	17.5	15	20	-1.23856	-1.17609	-1.30103
Higueras et al. (2014)	O. europea L.	Foliage	Spain	Joder		Study the concentration of mercury in soils and olive tree leaves in the aforementioned areas, which are heavily contaminated with mercury, in order to assess the particular behaviour of this element in olive trees under different conditions.	High-frequency modulation atomic absorption spectrometry with Zeeman effect (ZAAS-HFM), using a Lumex RA-915+ device with a pyrolysis attachment	161 ng/g	161	161			-2.20683												350-1500
Esbri et al. (2015)	O. europea L.	Foliage	Spain	Flix (Ebro river)	2007-2012	Atmospheric Hg and its incorporation in soils and lichens close to a mercury cell chlor-alkali plant	Zeeman effect Atomic Absorption Spectrometry with High Frequency Modulation technique (ZAAS-HFM), using a number of LUMEX-RA-915 series devices	481 ng/g	481	481			-2.68215													41°23'0°55'
Higueras et al. (2012)	O. europea L.	Foliage	Spain	Almaden mining district	May 2010 and January 2011	Analysis of these metals in soils and sets of olive trees of different ages from seven sites located at different distances from the main mercury sources	AAS (AMA 254).	1213 μg/kg	1213	1213			-3.08386
(This Study)	O. europea L.	Foliage	Lebanon	Bchaaleh	February 2019 till September 2020	Hg concentration seasonal variation in different plant tissues and elements of olive trees of Lebanon	AAS (AMA 254).	48.1 ng/g	48.1	48.1			-1.68215			4.1	23.8	14.3143	1631.7	62.9618	0.138813	6.80598	110.167	12.7224	1300	34°12’06″
	O. europea L.	Foliage	Lebanon	Kawkaba	March 2019 till September 2020			35 ng/g	35	35			-1.54407			6.8	27.2	17.2298	1311.2	60.6368	0.176937	6.76086	295.288	12.2724	672	33°23’856″
(This Study)	O. europea L.	Stems	Lebanon	Bchaaleh	February 2019 till September 2020		AAS (AMA 254).	7.9 ng/g	7.9	7.9			-0.897627			4.1	23.8	14.3143	1631.7	62.9618	0.138813	6.80598	110.167	12.7224	1300	34°12’06″
	O. europea L.	Stems	Lebanon	Kawkaba	March 2019 till September 2020			9 ng/g	9	9			-0.954243			6.8	27.2	17.2298	1311.2	60.6368	0.176937	6.76086	295.288	12.2724	672	33°23’856″
Llanos et al. (2011)	O. europea L.	Soil	Spain	Almaden (Castilla La Mancha, Las Cuevas Mine, Cerco Metalurgico de Almadenejos)	Summer, Spring, Fall, Winter 2009	Determine the variation in mercury emission flux (MEF) versus distance from the sources,regulating two major environmental parameters comprising soil temperature and solar radiation.	LUMEX RA-915+ equipment, based on Zeeman atomic absorption spectrometry, with high frequency modulation of light polarization (ZAAS-HFM),Addition of the RP-91C (pyrolysis) attachments	26–9770 mg/g	2.6e+7 to 9.77e+9	2.6e+7 to 9.77e+9
Esbri et al. (2015)	O. europea L.	Soil and Sediments	Spain	Ebro River basin (Close to the town of Flix (NE Spain)	2007-2012	Atmospheric Hg and its incorporation in soils and lichens close to a mercury cell chlor-alkali plant	Zeeman effect Atomic Absorption Spectrometry with High Frequency Modulation technique (ZAAS-HFM), using a number of LUMEX-RA-915 series devices	182 ng/g	182	182			-2.26007
Higueras et al. (2012)	O. europea L.	Soil	Spain	Almaden mining district	May 2010	Analysis of these metals in soils and sets of olive trees of different ages from seven sites located at different distances from the main mercury sources	AAS (AMA 254).	23479 μg/kg	23479	23479			-4.37068
Higueras et al. (2014)	O. europea L.	Soil	Spain	Joder		Study the concentration of mercury in soils and olive tree leaves in the aforementioned areas, which are heavily contaminated with mercury, in order to assess the particular behaviour of this element in olive trees under different conditions.	high-frequency modulation atomic absorption spectrometry with Zeeman effect (ZAAS-HFM), using a Lumex RA-915+ device with a pyrolysis attachment	564 ng/kg	0.564	0.564			0.248721
(This Study)	O. europea L.	Soil surface	Lebanon	Bchaaleh	February 2019 till September 2020 (Seasonal)	Hg concentration seasonal variation in different plant tissues and elements of olive trees of Lebanon	AAS (AMA 254).	61.9 ng/g	61.9	61.9			-1.79169			4.1	23.8	14.3143	1631.7	62.9618	0.138813	6.80598	110.167	12.7224	1300	34°12’06″
	O. europea L.	0-30 cm	Lebanon	Bchaaleh				31.8 ng/g	31.8	31.8			-1.50243
	O. europea L.	30-60 cm	Lebanon	Bchaaleh				19.5 ng/g	19.5	19.5			-1.29003
	O. europea L.	Soil Surface	Lebanon	Kawkaba	March 2019 till September 2020 (Seasonal)			128.5 ng/g	128.5	128.5			-2.1089			6.8	27.2	17.2298	1311.2	60.6368	0.176937	6.76086	295.288	12.2724	672	33°23’856″
	O. europea L.	0-30 cm	Lebanon	Kawkaba				70.2 ng/g	70.2	70.2			-1.84634
(This Study)	O. europea L.	Litterfall	Lebanon	Bchaaleh	February 2019 till September 2020		AAS (AMA 254).	62.9 ng/g	62.9	62.9			-1.79865			4.1	23.8	14.3143	1631.7	62.9618	0.138813	6.80598	110.167	12.7224	1300	34°12’06″
	O. europea L.	Litterfall	Lebanon	Kawkaba	March 2019 till September 2020			75.7 ng/g	75.7	75.7			-1.8791			6.8	27.2	17.2298	1311.2	60.6368	0.176937	6.76086	295.288	12.2724	672	33°23’856″
Amoros et al. (2014)	Vine	Foliage	Spain	Near Almaden		Study the distribution of Hg and some metals in vine leaves and soil of contaminated area and surrounding and in an area of 100km from the mine to asses the behavior of these elements in vines.	Lumex RA-915+ device, an atomic absorption spectrometer with a pyrolysis unit (RP-91c)	0.03--5.14 mg/kg	30 to 5140	2585	30	5140	-3.41246	-1.47712	-3.71096
Pleijel et al. (2021)	deciduous	Foliage	Sweden	Gothenburg (Botanical Garden and city area)	June and September 2018	Explored the mercury concentration, [Hg], in foliage from a diverse set of plant types, locations and sampling periods to study whether there is a continuous accumulation of Hg in leaves/needles over time.	Inductively coupled plasma mass spectrometry	9.2-21.5ng/g	9.2-21.5	15.35	9.2	21.5	-1.18611	-0.963788	-1.33244
	conifer	Foliage	Sweden					43.9 ng/g	43.9	43.9			-1.64246
	Evergreen	Foliage	East Africa	Rwanda	August -December 2013			43.9 ng/g	43.9	43.9			-1.64246
Fischer et al. (1995)	Fungus	Foliage	Germany	Former Mining area of Germany		Used a variable volume extraction procedure and aqueous sodium boron tetraethyl derivatization to determine accurately and precisely methylmercury bioconcentration factors for fungi.	Inductively coupled plasma mass spectrometry	6.2 to 144 ng/g	6.2 to 144	75.1	6.2	144	-1.87564	-0.792392	-2.15836
Rea et al (2002)	Sugar Maple	Foliage	USA	Vermont (Champlain Watershed)	23 May, 20 June, 11 August, 129 September 1995	Studied the biogeochemical cycle of Hg in deciduous forested ecosystems using foliage, litterfall, air, and soil samples and evaluated several potential uptake pathways for Hg.	Cold vapor atomic fluorescence spectroscopy using the dual amalgamation technique	3.6 ng/g	3.6	3.6			-0.556303
	Yelow birch	Foliage	USA		24 May, 20 June, 11 August, 29 September 1995			3.6 ng/g	3.6	3.6
	American beech	Foliage	USA					3.6 ng/g	3.6	3.6
	American beech	Foliage	USA	Michigan (Lake Huron Watershed)	30 May, 15 June, 31 July, 26 August, 20 September 1996			3.3 ng/g	3.3	3.3			-0.518514
	Red maple	Foliage	USA					3.3 ng/g	3.3	3.3
	White birch	Foliage	USA					3.3 ng/g	3.3	3.3
	Bigtooth aspen	Foliage	USA					3.3 ng/g	3.3	3.3
	red oak	Foliage	USA					3.3 ng/g	3.3	3.3
Yang et al. (2018)	Hardwood species	Foliage	USA	Northeast USA	7 August to 13 August 2015	Compare Hg pools among tissue types and between conifer and hardwood stands.	Thermal decomposition, catalytic conversion, amalgamation, and atomic absorption spectrophotometry using a Milestone DMA 80 direct Hg analyzer	16.3 ng/g	16.3	16.3			-1.21219
	Conifers	Foliage	USA					28.6 ng/g	28.6	28.6			-1.45637
Shaw and Panigrahi (1986)	C. sparsiflorus	Foliage	India	Chlor-alkali factory		A study was made of the pattern of distribution of mercury in the tissues of some plant species collected around a chlor-alkali factory in India	Analytical methods for Determination of Mercury with Mercury Analyser MA 5800A	2.32 to 27.9 mg/kg	2320 to 27900	15110	2320	27900	-4.17926	-3.36549	-4.4456
	J. gossypifolia	Foliage	India					2.32 to 18.25 mg/kg	2320 to18250	92285	2320	182250	-4.96513	-3.36549	-5.26067
	I. digitata	Foliage	India					7.07 to 19.87 mg/kg	7070 to 19870	3855	7070	19870	-3.58602	-3.84942	-4.2982
	A. mexicana	Foliage	India					3.44 to 4.27 mg/kg	3440 to 4270	3855	3440	4270	-3.58602	-3.53656	-3.63043
	C. procera	Foliage	India					14.73 to 38.83 mg/kg	14730 to 38830	26780	14730	38830	-4.42781	-4.1682	-4.58917
Rea et al (2002)		Soil	USA	Vermont (Champlain Watershed)	Early(1 September-15 October 1995) and Late ( 16 October 15 November 1995)	Studied the biogeochemical cycle of Hg in deciduous forested ecosystems using foliage, litterfall, air, and soil samples and evaluated several potential uptake pathways for Hg.	Cold vapor atomic fluorescence spectroscopy using the dual amalgamation technique	0.21-0.066 ng/m3																		44.53° 72.87°
		Soil	USA	Michigan (Lake Huron Watershed)	Early and late Season			0.042-0.0086 ng/m3																		45.57° 84.80°
Zhou et al. (2018)	Pinus massoniana Lamb. forest	Soil (0-5 cm)	China	Southwest China	March 2014 to January 2015	Quantify mercury internal biogeochemical cycling and the fractionation process in a coniferous forest and a broad-leaved forest in southwest China.	Direct mercury analyzer	182 to 256 ng/g	182 to 256	219	182	256	-2.34044	-2.26007	-2.40824			18.9	1105						500	29°380 104°410
	Pinus massoniana Lamb. forest	Soil (5-10 cm)	China					108 to 137 ng/g	108 to 137	122.5	108	137	-2.08814	-2.03342	-2.13672
	Cinnamom camphora forest	Soil (0-5 cm)	China					170 to 232 ng/g	170 to 232	201	170	232	-2.3032	-2.23045	-2.36549
	Cinnamom camphora forest	Soil (5-10 cm)	China					114 to 175ng/g	114 to 175	144.5	114	175	-2.15987	-2.0569	-2.24304
Shaw and Panigrahi 1986	C. sparsiflorus	Soil	India	Chlor-alkali factory		A study was made of the pattern of distribution of mercury in the tissues of some plant species collected around a chlor-alkali factory in India	Analytical methods for Determination of Mercury with Mercury Analyser MA 5800A	2.13 to 660 mg/kg	2130 to 660000	331065	2130	660000	-5.51991	-3.32838	-5.81954
Shaw and Panigrahi (1986)	J. gossypifolia							9.2 to 503.33 mg/kg	9200 to 503330	256265	9200	503330	-5.40869	-3.96379	-5.70185
	I. digitata							202 to 288.67 mg/kg	202000 to 288670	245335	202000	288670	-5.38976	-5.30535	-5.4604
	A. mexicana							3.87 to 5.2 mg/kg	3870 to 5200	4535	3870	5200	-3.65658	-3.58771	-3.716
Wang et al. (2016)	Castanopsis wattii	Soil	China	Southwest China (Mount Ailao)	2007-2013	Ppresent the data of Hg input through litterfall and Hg transformation during litter decomposition	Lumex RA-915+ multifunctional Hg analyzer equipped with a pyrolysis attachment.	257 ng/g	257	257			-2.40993
Shaw and Panigrahi (1986)	C. procera	Soil	India	Chlor-alkali factory		A study was made of the pattern of distribution of mercury in the tissues of some plant species collected around a chlor-alkali factory in India	Analytical methods for Determination of Mercury with Mercury Analyser MA 5800A	130 to 893.33 mg/kg	130000 to 893330	511665	130000	893330	-5.70899	-5.11394	-5.95101
Amoros et al. (2013)	Vine	Soil	Spain	Near Almaden		Study the distribution of Hg and some metals in vine leaves and soil of contaminated area and surrounding and in an area of 100km from the mine to asses the behavior of these elements in vines.	AAS (AMA 254)	0.04-2376 mg/kg	40 to 2376000	1188020	40	2376000	-6.07482	-1.60206	-6.37585
Wang et al. (2016)	Vine	Soil	China	Ailaoshan Station for Subtropical Forest Ecosystem Research Studies	2007-2013	Present the data of Hg input through litterfall and Hg transformation during litter decomposition	Lumex RA-915+ multifunctional Hg analyzer	257 ng/g	257	257			-2.40993					113	1400	84		5	700	5	2450	23.96° 101.52°
Pleijel et al. (2021)	Wheat	Grain	Sweden	Ostad	July 1999	Explored the mercury concentration, [Hg], in foliage from a diverse set of plant types, locations and sampling periods to study whether there is a continuous accumulation of Hg in leaves/needles over time.	Inductively coupled plasma mass spectrometry	<1 ng/g	<1	<1
Rea et al (2002)	Sugar Maple	Litterfall	USA	Vermont (Champlain Watershed)	Early(1 September-15 October 1995) and Late ( 16 October 15 November 1995)	Studied the biogeochemical cycle of Hg in deciduous forested ecosystems using foliage, litterfall, air, and soil samples and evaluated several potential uptake pathways for Hg.	Cold vapor atomic fluorescence spectroscopy using the dual amalgamation technique	47.1 ng/g	47.1	47.1			-1.67302													44.53° 72.87°
	Yelow birch	Litterfall	USA	Vermont (Champlain Watershed)				47.1 ng/g	47.1	47.1
	American beech	Litterfall	USA	Vermont (Champlain Watershed)				47.1 ng/g	47.1	47.1
	American beech	Litterfall	USA	Michigan (Lake Huron Watershed)	Early and late Season			32.5 ng/g	32.5	32.5			-1.51188													45.57° 84.80°
	Red maple	Litterfall	USA	Michigan (Lake Huron Watershed)				32.5 ng/g	32.5	32.5
	White birch	Litterfall	USA	Michigan (Lake Huron Watershed)				32.5 ng/g	32.5	32.5
	Bigtooth aspen	Litterfall	USA	Michigan (Lake Huron Watershed)				32.5 ng/g	32.5	32.5
	red oak	Litterfall	USA	Michigan (Lake Huron Watershed)				32.5 ng/g	32.5	32.5
Teixeria et al. (2017)	Evergreen mountain rain forest	Litterfall	Brazil	Southeasterm Brazil (Serra da Mantiqueira)	June 2009 to May 2011	This study reports on a biannual dynamics of Hg through different species assemblage of different successional stages in this biome, based on 24 litter traps used to collect litterfall from 3 different successional stages under a rainforest located at Brazilian Southeast	A Cold Vapour Atomic Absorption Spectrophotometry (CVAAS)	58.2 ng/g	58.2	58.2			-1.76492			17	24		1327						1200
Wang et al. (2016)	Castanopsis wattii, Lithocarpus xylocarpus, Schima noronhae, and Manglietia insignis	Litterfall	China	Ailaoshan Station for Subtropical Forest Ecosystem Research Studies	June 2011 till June 2014	Present the data of Hg input through litterfall and Hg transformation during litter decomposition	Lumex RA-915+ multifunctional Hg analyzer equipped with a pyrolysis attachment.	58 ng/g	58	58			-1.76343					113	1400	84		5	700	5	2450	23.96° 101.52°
	Gironniera subaequalis Planch, Pometia pinnata, Barringtonia racemose, and Alseodaphne hainanensis Merr	Litterfall	China	Shenlongjia				92 ng/g	92	92			-1.96379													31.45° 109.91°
	Gironniera subaequalis Planch, Pometia pinnata, Barringtonia racemose, and Alseodaphne hainanensis Merr	Litterfall	China	Jianfengling				78 ng/g	78	78			-1.89209													19.18° 109.73°
	Gironniera subaequalis Planch, Pometia pinnata, Barringtonia racemose, and Alseodaphne hainanensis Merr	Litterfall	China	Mount Wuyi				45 ng/g	45	45			-1.65321													28.04° 117.57°
	Gironniera subaequalis Planch, Pometia pinnata, Barringtonia racemose, and Alseodaphne hainanensis Merr	Litterfall	China	Xishuangbanna				74 ng/g	74	74			-1.86923													21.68° 101.42°
Zhou et al. (2018)	Pinus massoniana Lamb. forest	Litterfall	China	Southwest China	March 2014 to January 2017	Quantify mercury internal biogeochemical cycling and the fractionation process in a coniferous forest and a broad-leaved forest in southwest China	Direct mercury analyzer	71 to 108 ng/g	71 to 108	89.5	71	108	-1.95182	-1.85126	-2.03342			18.9	1105						500
		Litterfall	China	Southwest China				80 to 219 ng/g	80 to 219	149.5	80	219	-2.17464	-1.90309	-2.34044
	Cinnamom camphora forest	Litterfall	China	Southwest China				28 to 122 ng/g	28 to 122	75	28	122	-1.87506	-1.44716	-2.08636
		Litterfall	China	Southwest China				110 to 235 ng/g	110 to 235	172.5	110	235	-2.23679	-2.04139	-2.37107
Shaw and Panigrahi (1986)	C. sparsiflorus	Stems	India	Chlor-alkali factory		A study was made of the pattern of distribution of mercury in the tissues of some plant species collected around a chlor-alkali factory in India	Analytical methods for Determination of Mercury with Mercury Analyser MA 5800A	2.93 to 10.43 mg/kg	2930 to 10430	6680	2930	10430	-3.82478	-3.46687	-4.01828
	J. gossypifolia	Stems	India	Chlor-alkali factory				1.28 to 16.33 mg/kg	1280 to 16330	8805	1280	16330	-3.94473	-3.10721	-4.21299
	I. digitata	Stems	India	Chlor-alkali factory				2.12 to 4.62 mg/kg	2120 to 4620	3370	2120	4620	-3.52763	-3.32634	-3.66464
	A. mexicana	Stems	India	Chlor-alkali factory				3.02 to 3.82 mg/kg	3020 to 3820	3420	3020	3820	-3.53403	-3.48001	-3.58206
	C. procera	Stems	India	Chlor-alkali factory				2.43 to 10.7 mg/kg	2430 to 10700	6565	2430	10700	-3.81723	-3.38561	-4.02938
	C. sparsiflorus	Root	India	Chlor-alkali factory				1.55 to 4.61 mg/kg	1550 to 4610	3080	1550	4610	-3.48855	-3.19033	-3.6637
	J. gossypifolia	Root	India	Chlor-alkali factory				0.97 to 10.07 mg/kg	970 to 10070	5520	970	10070	-3.74194	-2.98677	-4.00303
	I. digitata	Root	India	Chlor-alkali factory				4.6 to 15.07 mg/kg	4600 to 15070	9835	4600	15070	-3.99277	-3.66276	-4.17811
	A. mexicana	Root	India	Chlor-alkali factory				3.02 to 3.92 mg/kg	3020 to3920	3470	3020	3920	-3.54033	-3.48001	-3.59329
	C. procera	Root	India	Chlor-alkali factory				3.33 to 15.07 mg/kg	3330 to 15070	9200	3330	15070	-3.96379	-3.52244	-4.17811
