# Supplementary material for: Seasonal variation of mercury concentration of ancient olive groves of Lebanon
Source: Copernicus journal article supplement (doi:10.5194/egusphere-2022-174), 2022-07-19
Supplement: Supplementary file 3 [file egusphere-2022-174-supplement.zip]

Archive with 2 entries (2 files):
- Supplementary Information.pdf
- Table S2-Synthesis of studies.xlsx
